# Supplementary material for: Genetic Incorporation of Unnatural Amino Acids into Proteins in Mycobacterium tuberculosis
Source: PubMed Central journal article supplement (PMC2825273; doi:10.1371/journal.pone.0009354), 2010-02-22

A

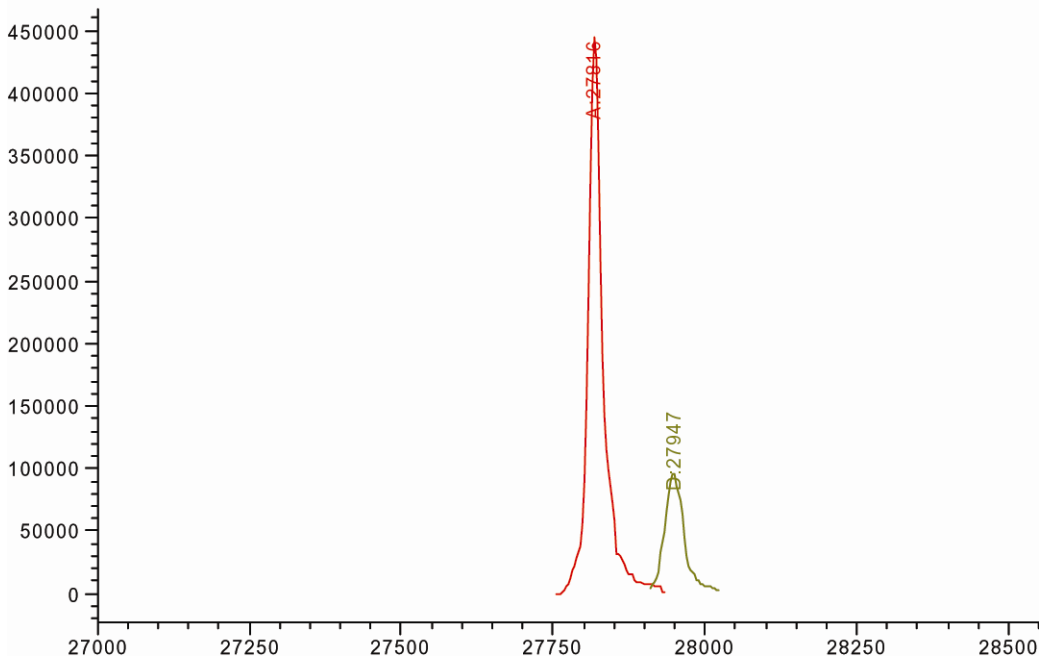

B

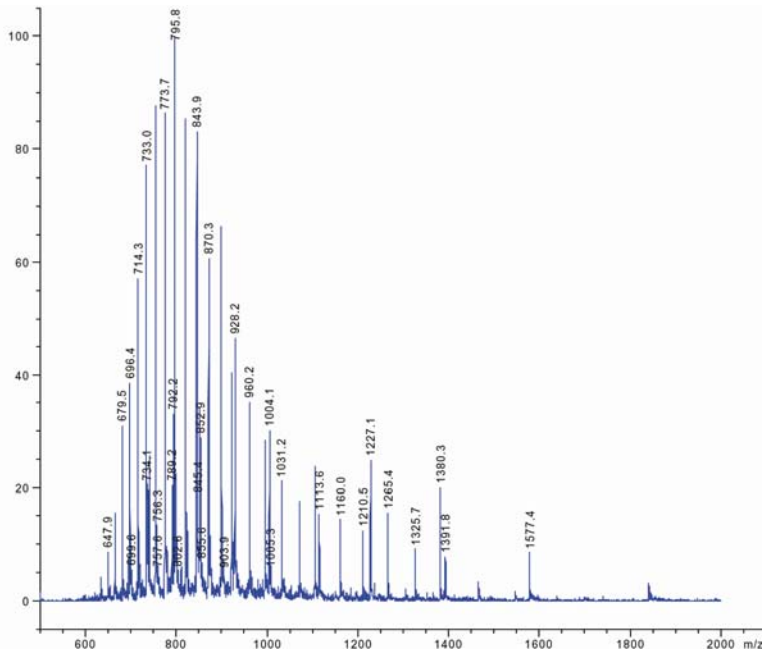

Supplement: pone.0009354.s002.pdf [file pone.0009354.s002.pdf]
